# Supplementary material for: Spatiotemporal Pattern of PM2.5 Concentrations in Mainland China and Analysis of Its Influencing Factors using Geographically Weighted Regression
Source: PubMed Central journal article supplement (PMC5228184; doi:10.1038/srep40607), 2017-01-12
Supplement: srep40607-s1.pdf [file srep40607-s1.pdf]

1 **Spatiotemporal Pattern of PM<sub>2.5</sub> Concentrations in Mainland China and**  
2 **Analysis of Its Influencing Factors using Geographically Weighted**  
3 **Regression**

4 **Jieqiong Luo<sup>1,2,3</sup>, Peijun Du<sup>1,2,3\*</sup>, Alim Samat<sup>4</sup>, Junshi Xia<sup>5</sup>, Meiqin Che<sup>1,2,3</sup>, Zhaohui Xue<sup>6</sup>**

5 1. Key Laboratory for Satellite Mapping Technology and Applications of State Administration of Surveying, Mapping  
6 and Geoinformation of China, Nanjing University, Nanjing 210023, China;

7 2. Jiangsu Provincial Key Laboratory of Geographic Information Science and Technology, Nanjing University, Nanjing  
8 210023, China

9 3. Jiangsu Center for Collaborative Innovation in Geographical Information Resource Development and Application

10 4. State Key Laboratory of Desert and Oasis Ecology, Xinjiang Institute of Ecology and Geography, Chinese Academy  
11 of Sciences, Urumqi 830011, China

12 5. Research Center for Advanced Science and Technology, The University of Tokyo 4-6-1 Komaba, Meguro-ku, Tokyo  
13 153-8904, Japan

14 6. School of Earth Sciences and Engineering, Hohai University, Nanjing 211100, China

15 \*Corresponding author Email: dupjrs@126.com

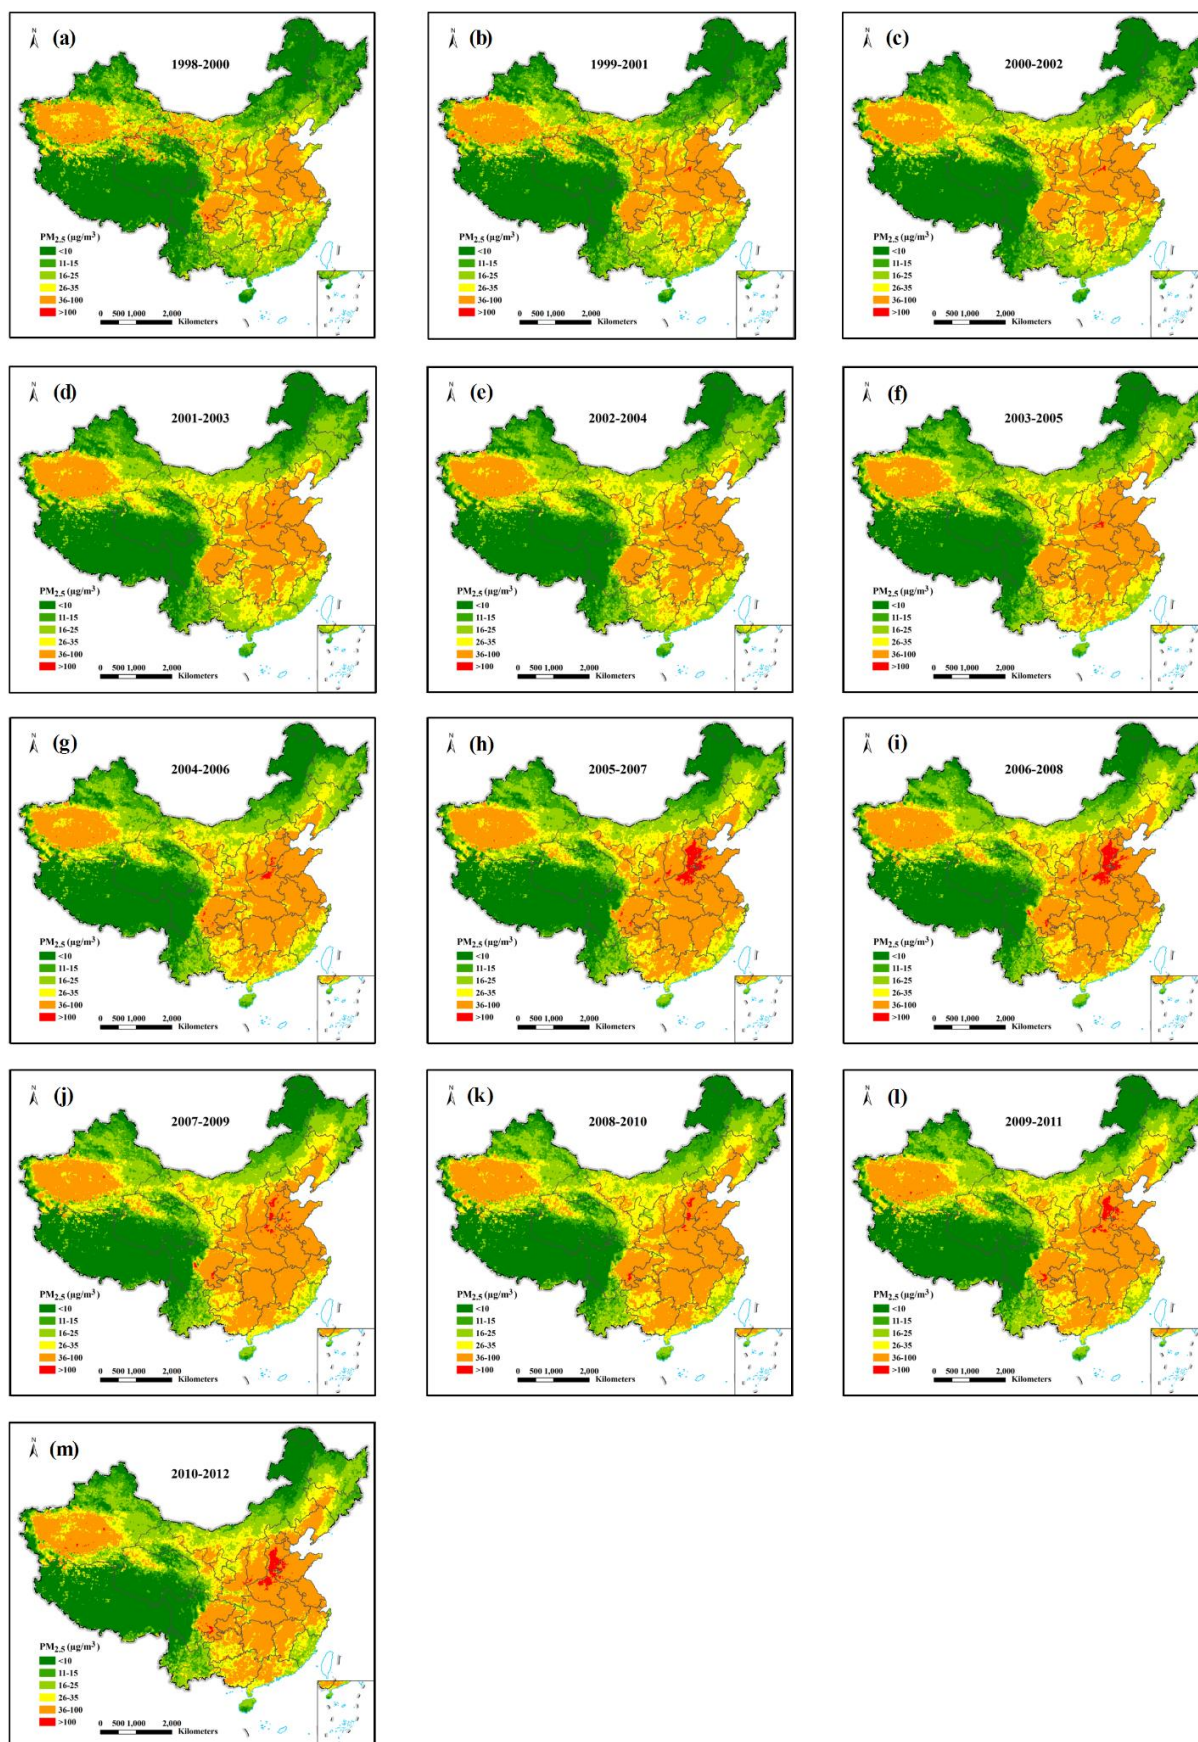

**Figure S1.** Spatial distribution of annual average  $\text{PM}_{2.5}$  concentrations across Mainland China during 1998-2012. (a) 1998-2000, (b) 1999-2001, (c) 2000-2002, (d) 2001-2003, (e) 2002-2004, (f) 2003-2005, (g) 2004-2006, (h) 2005-2007, (i) 2006-2008, (j) 2007-2009, (k) 2008-2010, (l) 2009-2011, (m) 2010-2012. All the maps were generated in ArcGIS10.2, URL: <http://www.esrichina-bj.cn/softwareproduct/ArcGIS/>

**Table S1** Basic information of 61 sample points which were extracted from 34 relevant studies.

| No | Sites     | Longitude | Latitude | Ground-based values ( $\mu\text{g}/\text{m}^3$ ) | Sampling period                                      | Reference                           |
|----|-----------|-----------|----------|--------------------------------------------------|------------------------------------------------------|-------------------------------------|
| 1  | Beijing   | 116.28    | 39.54    | 154.26                                           | 2001-2003                                            | Wang et al.(2005) <sup>1</sup>      |
| 2  | Beijing   | 116.4     | 39.9     | 121.85                                           | 2003.1,7                                             | Cao et al.(2007) <sup>2</sup>       |
| 3  | Beijing   | 116.34    | 40       | 77.8                                             | 2003                                                 | Wang et al.(2010) <sup>3</sup>      |
| 4  | Beijing   | 116.3     | 39.9     | 87.7                                             | 2005-2007                                            | Zhao et al.(2009) <sup>4</sup>      |
| 5  | Beijing   | 117.1     | 40.6     | 54.2                                             | 2005-2007                                            | Zhao et al.(2009) <sup>4</sup>      |
| 6  | Beijing   | 115.43    | 39.97    | 33.3                                             | 2009.9-2011.9                                        | Xin et al.(2014) <sup>5</sup>       |
| 7  | Beijing   | 116.3     | 40.35    | 59.2                                             | 2005.6.20-8.6                                        | Wu and Wang(2007) <sup>6</sup>      |
| 8  | Beijing   | 116.3     | 40.35    | 68                                               | 2005.6.29-8.2                                        | Pathak et al.(2011) <sup>7</sup>    |
| 9  | Changchun | 125.3     | 43.9     | 100.05                                           | 2003.1,7                                             | Cao et al.(2007) <sup>2</sup>       |
| 10 | Chengdu   | 104.02    | 30.66    | 165.1                                            | 2009.4-2010.1                                        | Tao et al.(2013) <sup>8</sup>       |
| 11 | Chengdu   | 104.07    | 30.68    | 165.1                                            | 2009.4.29-5.17,7.6-8.6,10.26-11.26,<br>2010.1.1-1.31 | Zhang et al.(2013) <sup>9</sup>     |
| 12 | Chongqing | 106.5     | 29.5     | 214.05                                           | 2003.1,7                                             | Cao et al.(2007) <sup>2</sup>       |
| 13 | Chongqing | 106.48    | 29.48    | 131.9                                            | 2012.2-12                                            | Ren et al.(2014) <sup>10</sup>      |
| 14 | Chongqing | 106.49    | 29.59    | 104                                              | 2010.3-2011.7                                        | Zhang et al.(2012a) <sup>11</sup>   |
| 15 | Fuzhou    | 119.3     | 26.11    | 44.33                                            | 2007.4-2008.1                                        | Xu et al.(2012) <sup>12</sup>       |
| 16 | Fuzhou    | 119.32    | 26.08    | 44.33                                            | 2007.4-2008.1                                        | Xu et al.(2012) <sup>12</sup>       |
| 17 | Guangzhou | 113.2     | 23.1     | 102.55                                           | 2003.1,7                                             | Cao et al.(2007) <sup>2</sup>       |
| 18 | Guangzhou | 113.26    | 23.13    | 102.9                                            | 2004.10.5-11.5                                       | Andreae et al. (2008) <sup>13</sup> |
| 19 | Guangzhou | 113.53    | 22.7     | 113                                              | 2007.10.23-11.24                                     | Ding et al.(2011) <sup>14</sup>     |
| 20 | Guangzhou | 113.35    | 23.12    | 76.8                                             | 2009.4-2010.1                                        | Tao et al.(2012) <sup>15</sup>      |
| 21 | Guangzhou | 113.53    | 22.7     | 70.8                                             | 2010.11.02-12.26                                     | Wang et al.(2012) <sup>16</sup>     |
| 22 | Guangzhou | 113.31    | 23.16    | 127                                              | 2003.7-2004.6                                        | Li et al. (2005) <sup>17</sup>      |
| 23 | Guangzhou | 113.31    | 23.1     | 62                                               | 2008                                                 | Zhu et al.(2013) <sup>18</sup>      |
| 24 | Guangzhou | 113.31    | 23.1     | 50                                               | 2009                                                 | Zhu et al.(2013) <sup>18</sup>      |
| 25 | Guangzhou | 113.31    | 23.1     | 55                                               | 2010                                                 | Zhu et al.(2013) <sup>18</sup>      |
| 26 | Guangzhou | 113.35    | 23.12    | 103.3                                            | 2010.1.1-31                                          | Tao et al.(2012) <sup>15</sup>      |
| 27 | Guangzhou | 113.35    | 23.12    | 79.2                                             | 2007.4.1-30                                          | Tao et al.(2009) <sup>19</sup>      |
| 28 | Guangzhou | 113.62    | 22.6     | 59                                               | 2004.5.15-27                                         | Pathak et al.(2011) <sup>7</sup>    |
| 29 | Hangzhou  | 120.1     | 30.2     | 129.6                                            | 2003.1,7                                             | Cao et al.(2007) <sup>2</sup>       |
| 30 | Jinchang  | 101.1     | 38.3     | 83.1                                             | 2003.1,7                                             | Cao et al.(2007) <sup>2</sup>       |
| 31 | Ling'an   | 119.75    | 30.28    | 90                                               | 1999.10-11                                           | Xu et al.(2002) <sup>20</sup>       |
| 32 | Nanjing   | 118.73    | 32.21    | 135.33                                           | 2002.12-2003.10                                      | Fan et al.(2005) <sup>21</sup>      |
| 33 | Nanjing   | 118.79    | 32.06    | 122.5                                            | 2002.12-2003.10                                      | Fan et al.(2005) <sup>21</sup>      |
| 34 | Qingdao   | 120.44    | 36.11    | 49.36                                            | 1998–2000                                            | Hu et al.(2002) <sup>22</sup>       |
| 35 | Qingdao   | 120.3     | 36       | 79                                               | 2003.1,7                                             | Cao et al.(2007) <sup>2</sup>       |

|    |          |        |       |        |                                                         |                                   |
|----|----------|--------|-------|--------|---------------------------------------------------------|-----------------------------------|
| 36 | Qingdao  | 120.41 | 36.23 | 168    | 2011.10.25-11.3,2012.2.15-22,3.28-29,<br>5.3-12,8.22-30 | Wu et al.(2013) <sup>23</sup>     |
| 37 | Qingdao  | 120.31 | 36.06 | 158    | 2011.10.25-11.3,2012.2.15-22,3.28-29,<br>5.3-12,8.22-30 | Wu et al.(2013) <sup>23</sup>     |
| 38 | Shanghai | 121.5  | 31.2  | 66.1   | 1999.5–2000.3                                           | Ye et al.(2003) <sup>24</sup>     |
| 39 | Shanghai | 121.4  | 31.2  | 101.65 | 2003.1,7                                                | Cao et al.(2007) <sup>2</sup>     |
| 40 | Shanghai | 121.5  | 31.3  | 94.64  | 2003.9-2005.1                                           | Wang et al.(2006) <sup>25</sup>   |
| 41 | Shanghai | 121.3  | 31.3  | 92.9   | 2005.10-2006.7                                          | Feng et al.(2009) <sup>26</sup>   |
| 42 | Shenzhen | 113.9  | 22.58 | 42.3   | 2008.12.30-2009.12.25                                   | Yun et al.(2013) <sup>27</sup>    |
| 43 | Shenzhen | 114.12 | 22.56 | 31     | 2008.12.30-2009.12.25                                   | Yun et al.(2013) <sup>27</sup>    |
| 44 | Shenzhen | 114.3  | 22.6  | 28.9   | 2008.12.30-2009.12.25                                   | Yun et al.(2013) <sup>27</sup>    |
| 45 | Tianjin  | 117.2  | 39.1  | 141.3  | 2003.1,7                                                | Cao et al.(2007) <sup>2</sup>     |
| 46 | Urumqi   | 89.15  | 42.6  | 92.8   | 2011.1-12                                               | Wang et al.(2016) <sup>28</sup>   |
| 47 | Wuhan    | 114.2  | 30.5  | 118.7  | 2003.1,7                                                | Cao et al.(2007) <sup>2</sup>     |
| 48 | Xiamen   | 118.1  | 24.4  | 47.7   | 2003.1,7                                                | Cao et al.(2007) <sup>2</sup>     |
| 49 | Xiamen   | 118.06 | 24.61 | 86.16  | 2009.6-2010.5                                           | Zhang et al.(2012b) <sup>29</sup> |
| 50 | Xi'an    | 108.9  | 34.2  | 253    | 2003.1,7                                                | Cao et al.(2007) <sup>2</sup>     |
| 51 | Xi'an    | 108.54 | 34.16 | 183.8  | 2003.9-2007.7                                           | Liu et al.(2009) <sup>30</sup>    |
| 52 | Xi'an    | 108.54 | 34.16 | 189.1  | 2003.9-12                                               | Liu et al.(2009) <sup>30</sup>    |
| 53 | Xi'an    | 108.54 | 34.16 | 167.4  | 2004                                                    | Liu et al.(2009) <sup>30</sup>    |
| 54 | Xi'an    | 108.54 | 34.16 | 183.8  | 2005                                                    | Liu et al.(2009) <sup>30</sup>    |
| 55 | Xi'an    | 108.54 | 34.16 | 193.1  | 2006                                                    | Liu et al.(2009) <sup>30</sup>    |
| 56 | Xi'an    | 108.88 | 34.23 | 182.2  | 2006.1-2008.12                                          | Cao et al.(2012) <sup>31</sup>    |
| 57 | Xi'an    | 108.88 | 34.23 | 194.1  | 2006.3-2007.3                                           | Zhang et al.(2011) <sup>32</sup>  |
| 58 | Xi'an    | 108.54 | 34.16 | 192.8  | 2007.1-7                                                | Liu et al.(2009) <sup>30</sup>    |
| 59 | Xi'an    | 108.54 | 34.16 | 126.85 | 2008.7.5-2009.8.8                                       | Liu et al.(2013) <sup>33</sup>    |
| 60 | Xi'an    | 108.88 | 34.23 | 193.9  | 2012.12.1-31                                            | Zhang et al.(2015) <sup>34</sup>  |
| 61 | Yulin    | 109.8  | 38.3  | 100.55 | 2003.1,7                                                | Cao et al.(2007) <sup>2</sup>     |

18

## 19 References

- 20 1. Wang, Y. et al. The ion chemistry and the source of PM<sub>2.5</sub> aerosol in Beijing. *Atmos. Environ.* **39**, 3771–3784 (2005).
- 21 2. Cao, J. et al. Spatial and seasonal distributions of carbonaceous aerosols over China. *J. Geophys. Res.* **112**, 22-11
- 22 (2007).
- 23 3. Wang, J., Yang, F., Wang, D., & He, K. Characteristics and relationship of aerosol optical thickness and PM<sub>2.5</sub>
- 24 concentration over Beijing. *Journal of the Graduate School of the Chinese Academy of Sciences*, **27**, 10–16 (2010)
- 25 (In Chinese).
- 26 4. Zhao, X. et al. Seasonal and diurnal variations of ambient PM<sub>2.5</sub> concentration in urban and rural environments in
- 27 Beijing. *Atmos. Environ.* **43**, 2893–2900 (2009).

- 28 5. Xin, J. et al. The empirical relationship between the PM<sub>2.5</sub> concentration and aerosol optical depth over the  
29 background of North China from 2009 to 2011. *Atmos. Res.* **138**, 179–188 (2014).
- 30 6. Wu, S., Wang, T. On the performance of a semi-continuous PM<sub>2.5</sub>, sulphate and nitrate instrument under high loadings  
31 of particulate and sulphur dioxide. *Atmos. Environ.* **41**, 5442–5451 (2007)
- 32 7. Pathak R K, Wang T, Ho K F, et al. Characteristics of summertime PM<sub>2.5</sub> organic and elemental carbon in four major  
33 Chinese cities: Implications of high acidity for water-soluble organic carbon (WSOC). *Atmos. Environ.* **45**, 318-  
34 325 (2011).
- 35 8. Tao, J. et al. Chemical composition of PM<sub>2.5</sub> at an urban site of Chengdu in southwestern China. *Adv. Atmos. Sci.* **30**,  
36 1070–1084 (2013).
- 37 9. Zhang, Z., Tao, J., Xie, S., et al. Seasonal variations and source apportionment of PM<sub>2.5</sub> at urban area of Chengdu.  
38 *Acta Scientiae Circumstantiae.* **33**, 2947–2952 (2013) (In Chinese).
- 39 10. Ren, L., Zhou, Z., Zhao, X., et al. Source apportionment of PM<sub>10</sub> and PM<sub>2.5</sub> in urban areas of Chongqing. *Res.*  
40 *Environ. Sci.* **27**, 1387–1394 (2014) (In Chinese).
- 41 11. Zhang, D., Zhai, C., Zhou, Z., et al. Characteristics of water-soluble inorganic ions in different size particles in  
42 Chongqing. *Res. Environ. Sci.* **25**, 1099–1106 (2012) (In Chinese).
- 43 12. Xu, L. et al. Seasonal variations and chemical compositions of PM<sub>2.5</sub> aerosol in the urban area of Fuzhou, China.  
44 *Atmos. Res.* **104**, 264–272 (2012).
- 45 13. Andreae, M. O. et al. Optical properties and chemical composition of the atmospheric aerosol in urban Guangzhou,  
46 China. *Atmos. Environ.* **42**, 6335–6350 (2008).
- 47 14. Ding, X., Wang, X., & Zheng, M. The influence of temperature and aerosol acidity on biogenic secondary organic  
48 aerosol tracers: Observations at a rural site in the central Pearl River Delta region, South China. *Atmos. Environ.*  
49 **45**, 1303–1311 (2011).
- 50 15. Tao, J. et al. Reconstructed light extinction coefficients using chemical compositions of PM<sub>2.5</sub> in winter in urban  
51 Guangzhou, China. *Advances in Atmospheric Sciences. Adv. Atmos. Sci.* **29**, 359–368 (2012).
- 52 16. Wang, X. et al. Aerosol scattering coefficients and major chemical compositions of fine particles observed at a rural  
53 site hit the central Pearl River Delta, South China. *J Environ Sci-China.* **24**, 72–77 (2012).
- 54 17. Li, L. et al. Variations of PM<sub>10</sub> and PM<sub>2.5</sub> levels in street microenvironment in Guangzhou. *Earth Environ.* **33**, 57-  
55 60 (2005) (In Chinese).
- 56 18. Zhu, Q., Liu, Y., Xu, W., Huang, M. Analysis on the Pollution Characteristics and Influence Factors of PM<sub>2.5</sub> in  
57 Guangzhou. *Environ. Monitor. Chin.* **29**, 15–21 (2013) (In Chinese).
- 58 19. Tao, J., Ho, K., Chen, L., Zhu, L., et al. Effect of chemical composition of PM<sub>2.5</sub> on visibility in  
59 Guangzhou, China, 2007 spring. *Particuology.* **7**, 68–75 (2009).
- 60 20. Xu, J., et al. Measurement of aerosol chemical, physical and radiative properties in the Yangtze delta region of  
61 China. *Atmos. Environ.* **36**, 161–173 (2002).
- 62 21. Fan J., Zheng Y., Wang Z. Compared analysis of element content in atmospheric PM<sub>2.5</sub> in Nanjing urban and  
63 suburban area. *Chin. Environ. Sci.* **25**, 146–150 (2005) (In Chinese).
- 64 22. Hu, M. et al. Seasonal variation of ionic species in fine particles at Qingdao, China. *Atmos. Environ.* **36**, 5853–5859  
65 (2002).
- 66 23. Wu, h., Zhang, C., Wang, J., et al. Comparative study on pollution characteristics and source apportionment of PM<sub>10</sub>

- 67 and PM<sub>2.5</sub> in Qingdao. *Res. Environ. Sci.* **26**, 583-589 (2013) (In Chinese).
- 68 24. Ye, B. et al. Concentration and chemical composition of PM<sub>2.5</sub> in Shanghai for a 1-year period. *Atmos. Environ.* **37**,
- 69 499–510 (2003).
- 70 25. Wang, Y. et al. The ion chemistry, seasonal cycle, and sources of PM<sub>2.5</sub> and TSP aerosol in Shanghai. *Atmos. Environ.*
- 71 **40**, 2935–2952 (2006).
- 72 26. Feng, Y. et al. Characteristics of organic and elemental carbon in PM<sub>2.5</sub> samples in Shanghai, China. *Atmos. Environ.*
- 73 **92**, 434–442 (2009).
- 74 27. Yun, H. et al. Characterising Seasonal Variation and Spatial Distribution of PM<sub>2.5</sub> Species in Shenzhen. *Environ. Sci.*
- 75 **34**, 1245-1251 (2013) (In Chinese).
- 76 28. Wang, G. et al. Seasonal changes of carbonaceous species in PM<sub>2.5</sub>, PM<sub>2.5-10</sub> in Urumqi. *Chin Environ Sci.* **36**, 356-
- 77 362 (2016) (In Chinese).
- 78 29. Zhang, F. et al. Chemical compositions and extinction coefficients of PM<sub>2.5</sub> in peri-urban of Xiamen, China, during
- 79 June 2009–May 2010. *Atmos. Res.* **106**, 150–158 (2012)
- 80 30. Liu, S., Cao, J., & An, Z. Characterization of ambient fine particles (PM<sub>2.5</sub>) concentration and its influential factors
- 81 in Xi'an. *Chin. J. Proc.* **S2**, 231–236 (2009) (In Chinese).
- 82 31. Cao, J. et al. Impacts of aerosol compositions on visibility impairment in Xi'an, China. *Atmos. Environ.* **59**, 559–
- 83 566 (2012).
- 84 32. Zhang, T. et al. Water-soluble ions in atmospheric aerosols measured in Xi'an, China: Seasonal variations and
- 85 sources. *Atmos. Res.* **102**, 110–119 (2011).
- 86 33. Liu, S., Cao, J., Ho, K., Xu, H. Characteristics of water-soluble organic and inorganic nitrogen in atmospheric fine
- 87 particles (PM<sub>2.5</sub>) from Xi'an. *J. Earth Environ.* **4**, 1272–1279 (2013) (In Chinese).
- 88 34. Zhang, Q., Shen, Z., Cao, J., et al. Variations in PM<sub>2.5</sub>, TSP, BC, and trace gases (NO<sub>2</sub>, SO<sub>2</sub>, and O<sub>3</sub>) between haze
- 89 and non-haze episodes in winter over Xi'an, China. *Atmos. Environ.* **112**, 64-71 (2015).
